# Supplementary material for: Higher baseline levels of CSF inflammation increase risk of incident mild cognitive impairment and Alzheimer's disease dementia
Source: PubMed Central journal article supplement — Alzheimers Dement (Amst). 2022 Sep 19;14(1):e12346. doi: 10.1002/dad2.12346 (PMC9484791; doi:10.1002/dad2.12346), 2022-09-19
Supplement: DAD2-14-e12346-s001.pdf [file DAD2-14-e12346-s001.pdf]

## ICMJE DISCLOSURE FORM

**Date:** 6/2/2021

**Your Name:** Joey A Contreras

**Manuscript Title:** Higher baseline levels of CSF inflammation increase risk of incident mild cognitive impairment and Alzheimer’s disease dementia

**Manuscript Number (if known):** DADM-D-22-00031R1

In the interest of transparency, we ask you to disclose all relationships/activities/interests listed below that are related to the content of your manuscript. “Related” means any relation with for-profit or not-for-profit third parties whose interests may be affected by the content of the manuscript. Disclosure represents a commitment to transparency and does not necessarily indicate a bias. If you are in doubt about whether to list a relationship/activity/interest, it is preferable that you do so.

The author’s relationships/activities/interests should be defined broadly. For example, if your manuscript pertains to the epidemiology of hypertension, you should declare all relationships with manufacturers of antihypertensive medication, even if that medication is not mentioned in the manuscript.

In item #1 below, report all support for the work reported in this manuscript without time limit. For all other items, the time frame for disclosure is the past 36 months.

|                                                    | Name all entities with whom you have this relationship or indicate none (add rows as needed)                                                                                   | Specifications/Comments (e.g., if payments were made to you or to your institution)                                                                                                                                                                                                                                                                                                                                                       |  |  |  |  |  |  |
|----------------------------------------------------|--------------------------------------------------------------------------------------------------------------------------------------------------------------------------------|-------------------------------------------------------------------------------------------------------------------------------------------------------------------------------------------------------------------------------------------------------------------------------------------------------------------------------------------------------------------------------------------------------------------------------------------|--|--|--|--|--|--|
| Time frame: Since the initial planning of the work |                                                                                                                                                                                |                                                                                                                                                                                                                                                                                                                                                                                                                                           |  |  |  |  |  |  |
| <b>1</b>                                           | All support for the present manuscript (e.g., funding, provision of study materials, medical writing, article processing charges, etc.)<br><b>No time limit for this item.</b> | <input checked="" type="checkbox"/> None<br><table border="1" style="width: 100%; border-collapse: collapse; margin-top: 5px;"> <tr><td style="height: 15px;"> </td><td style="width: 100px;"> </td></tr> <tr><td style="height: 15px;"> </td><td> </td></tr> <tr><td style="height: 15px;"> </td><td> </td></tr> </table> <p style="font-size: small; text-align: right; margin-top: 5px;">Click the tab key to add additional rows.</p> |  |  |  |  |  |  |
|                                                    |                                                                                                                                                                                |                                                                                                                                                                                                                                                                                                                                                                                                                                           |  |  |  |  |  |  |
|                                                    |                                                                                                                                                                                |                                                                                                                                                                                                                                                                                                                                                                                                                                           |  |  |  |  |  |  |
|                                                    |                                                                                                                                                                                |                                                                                                                                                                                                                                                                                                                                                                                                                                           |  |  |  |  |  |  |
| Time frame: past 36 months                         |                                                                                                                                                                                |                                                                                                                                                                                                                                                                                                                                                                                                                                           |  |  |  |  |  |  |
| <b>2</b>                                           | Grants or contracts from any entity (if not indicated in item #1 above).                                                                                                       | <input checked="" type="checkbox"/> None<br><table border="1" style="width: 100%; border-collapse: collapse; margin-top: 5px;"> <tr><td style="height: 15px;"> </td><td style="width: 100px;"> </td></tr> <tr><td style="height: 15px;"> </td><td> </td></tr> <tr><td style="height: 15px;"> </td><td> </td></tr> </table>                                                                                                                |  |  |  |  |  |  |
|                                                    |                                                                                                                                                                                |                                                                                                                                                                                                                                                                                                                                                                                                                                           |  |  |  |  |  |  |
|                                                    |                                                                                                                                                                                |                                                                                                                                                                                                                                                                                                                                                                                                                                           |  |  |  |  |  |  |
|                                                    |                                                                                                                                                                                |                                                                                                                                                                                                                                                                                                                                                                                                                                           |  |  |  |  |  |  |

|    |                                                                                                              |                                                                                                                                                                                                        |  |  |  |  |  |  |
|----|--------------------------------------------------------------------------------------------------------------|--------------------------------------------------------------------------------------------------------------------------------------------------------------------------------------------------------|--|--|--|--|--|--|
| 3  | Royalties or licenses                                                                                        | <input checked="" type="checkbox"/> <b>None</b><br><table border="1" data-bbox="391 195 963 296"> <tr><td> </td><td> </td></tr> <tr><td> </td><td> </td></tr> <tr><td> </td><td> </td></tr> </table>   |  |  |  |  |  |  |
|    |                                                                                                              |                                                                                                                                                                                                        |  |  |  |  |  |  |
|    |                                                                                                              |                                                                                                                                                                                                        |  |  |  |  |  |  |
|    |                                                                                                              |                                                                                                                                                                                                        |  |  |  |  |  |  |
| 4  | Consulting fees                                                                                              | <input checked="" type="checkbox"/> <b>None</b><br><table border="1" data-bbox="391 436 963 569"> <tr><td> </td><td> </td></tr> <tr><td> </td><td> </td></tr> <tr><td> </td><td> </td></tr> </table>   |  |  |  |  |  |  |
|    |                                                                                                              |                                                                                                                                                                                                        |  |  |  |  |  |  |
|    |                                                                                                              |                                                                                                                                                                                                        |  |  |  |  |  |  |
|    |                                                                                                              |                                                                                                                                                                                                        |  |  |  |  |  |  |
| 5  | Payment or honoraria for lectures, presentations, speakers bureaus, manuscript writing or educational events | <input checked="" type="checkbox"/> <b>None</b><br><table border="1" data-bbox="391 657 963 758"> <tr><td> </td><td> </td></tr> <tr><td> </td><td> </td></tr> <tr><td> </td><td> </td></tr> </table>   |  |  |  |  |  |  |
|    |                                                                                                              |                                                                                                                                                                                                        |  |  |  |  |  |  |
|    |                                                                                                              |                                                                                                                                                                                                        |  |  |  |  |  |  |
|    |                                                                                                              |                                                                                                                                                                                                        |  |  |  |  |  |  |
| 6  | Payment for expert testimony                                                                                 | <input checked="" type="checkbox"/> <b>None</b><br><table border="1" data-bbox="391 1003 963 1104"> <tr><td> </td><td> </td></tr> <tr><td> </td><td> </td></tr> <tr><td> </td><td> </td></tr> </table> |  |  |  |  |  |  |
|    |                                                                                                              |                                                                                                                                                                                                        |  |  |  |  |  |  |
|    |                                                                                                              |                                                                                                                                                                                                        |  |  |  |  |  |  |
|    |                                                                                                              |                                                                                                                                                                                                        |  |  |  |  |  |  |
| 7  | Support for attending meetings and/or travel                                                                 | <input checked="" type="checkbox"/> <b>None</b><br><table border="1" data-bbox="391 1224 963 1325"> <tr><td> </td><td> </td></tr> <tr><td> </td><td> </td></tr> <tr><td> </td><td> </td></tr> </table> |  |  |  |  |  |  |
|    |                                                                                                              |                                                                                                                                                                                                        |  |  |  |  |  |  |
|    |                                                                                                              |                                                                                                                                                                                                        |  |  |  |  |  |  |
|    |                                                                                                              |                                                                                                                                                                                                        |  |  |  |  |  |  |
| 8  | Patents planned, issued or pending                                                                           | <input checked="" type="checkbox"/> <b>None</b><br><table border="1" data-bbox="391 1444 963 1545"> <tr><td> </td><td> </td></tr> <tr><td> </td><td> </td></tr> <tr><td> </td><td> </td></tr> </table> |  |  |  |  |  |  |
|    |                                                                                                              |                                                                                                                                                                                                        |  |  |  |  |  |  |
|    |                                                                                                              |                                                                                                                                                                                                        |  |  |  |  |  |  |
|    |                                                                                                              |                                                                                                                                                                                                        |  |  |  |  |  |  |
| 9  | Participation on a Data Safety Monitoring Board or Advisory Board                                            | <input checked="" type="checkbox"/> <b>None</b><br><table border="1" data-bbox="391 1665 963 1766"> <tr><td> </td><td> </td></tr> <tr><td> </td><td> </td></tr> <tr><td> </td><td> </td></tr> </table> |  |  |  |  |  |  |
|    |                                                                                                              |                                                                                                                                                                                                        |  |  |  |  |  |  |
|    |                                                                                                              |                                                                                                                                                                                                        |  |  |  |  |  |  |
|    |                                                                                                              |                                                                                                                                                                                                        |  |  |  |  |  |  |
| 10 | Leadership or fiduciary role in other board, society, committee or                                           | <input checked="" type="checkbox"/> <b>None</b><br><table border="1" data-bbox="391 1843 963 1944"> <tr><td> </td><td> </td></tr> <tr><td> </td><td> </td></tr> <tr><td> </td><td> </td></tr> </table> |  |  |  |  |  |  |
|    |                                                                                                              |                                                                                                                                                                                                        |  |  |  |  |  |  |
|    |                                                                                                              |                                                                                                                                                                                                        |  |  |  |  |  |  |
|    |                                                                                                              |                                                                                                                                                                                                        |  |  |  |  |  |  |

|           |                                                                                  |                                                                                                                                                                    |  |  |  |  |  |  |
|-----------|----------------------------------------------------------------------------------|--------------------------------------------------------------------------------------------------------------------------------------------------------------------|--|--|--|--|--|--|
|           | advocacy group, paid or unpaid                                                   |                                                                                                                                                                    |  |  |  |  |  |  |
| <b>11</b> | Stock or stock options                                                           | <input checked="" type="checkbox"/> <b>None</b><br><table border="1"> <tr><td></td><td></td></tr> <tr><td></td><td></td></tr> <tr><td></td><td></td></tr> </table> |  |  |  |  |  |  |
|           |                                                                                  |                                                                                                                                                                    |  |  |  |  |  |  |
|           |                                                                                  |                                                                                                                                                                    |  |  |  |  |  |  |
|           |                                                                                  |                                                                                                                                                                    |  |  |  |  |  |  |
| <b>12</b> | Receipt of equipment, materials, drugs, medical writing, gifts or other services | <input checked="" type="checkbox"/> <b>None</b><br><table border="1"> <tr><td></td><td></td></tr> <tr><td></td><td></td></tr> <tr><td></td><td></td></tr> </table> |  |  |  |  |  |  |
|           |                                                                                  |                                                                                                                                                                    |  |  |  |  |  |  |
|           |                                                                                  |                                                                                                                                                                    |  |  |  |  |  |  |
|           |                                                                                  |                                                                                                                                                                    |  |  |  |  |  |  |
| <b>13</b> | Other financial or non-financial interests                                       | <input checked="" type="checkbox"/> <b>None</b><br><table border="1"> <tr><td></td><td></td></tr> <tr><td></td><td></td></tr> <tr><td></td><td></td></tr> </table> |  |  |  |  |  |  |
|           |                                                                                  |                                                                                                                                                                    |  |  |  |  |  |  |
|           |                                                                                  |                                                                                                                                                                    |  |  |  |  |  |  |
|           |                                                                                  |                                                                                                                                                                    |  |  |  |  |  |  |

**Please place an "X" next to the following statement to indicate your agreement:**

I certify that I have answered every question and have not altered the wording of any of the questions on this form.

## ICMJE DISCLOSURE FORM

**Date:** 6/2/2021

**Your Name:** Judy Pa

**Manuscript Title:** Higher baseline levels of CSF inflammation increase risk of incident mild cognitive impairment and Alzheimer’s disease dementia

**Manuscript Number (if known):** DADM-D-22-00031R1

In the interest of transparency, we ask you to disclose all relationships/activities/interests listed below that are related to the content of your manuscript. “Related” means any relation with for-profit or not-for-profit third parties whose interests may be affected by the content of the manuscript. Disclosure represents a commitment to transparency and does not necessarily indicate a bias. If you are in doubt about whether to list a relationship/activity/interest, it is preferable that you do so.

The author’s relationships/activities/interests should be defined broadly. For example, if your manuscript pertains to the epidemiology of hypertension, you should declare all relationships with manufacturers of antihypertensive medication, even if that medication is not mentioned in the manuscript.

In item #1 below, report all support for the work reported in this manuscript without time limit. For all other items, the time frame for disclosure is the past 36 months.

|                                                    | Name all entities with whom you have this relationship or indicate none (add rows as needed)                                                                                   | Specifications/Comments (e.g., if payments were made to you or to your institution)                                                                                                                                                                                                                                                                                      |                                                   |  |  |  |                                           |  |
|----------------------------------------------------|--------------------------------------------------------------------------------------------------------------------------------------------------------------------------------|--------------------------------------------------------------------------------------------------------------------------------------------------------------------------------------------------------------------------------------------------------------------------------------------------------------------------------------------------------------------------|---------------------------------------------------|--|--|--|-------------------------------------------|--|
| Time frame: Since the initial planning of the work |                                                                                                                                                                                |                                                                                                                                                                                                                                                                                                                                                                          |                                                   |  |  |  |                                           |  |
| <b>1</b>                                           | All support for the present manuscript (e.g., funding, provision of study materials, medical writing, article processing charges, etc.)<br><b>No time limit for this item.</b> | <input type="checkbox"/> None<br><table border="1" style="width: 100%; border-collapse: collapse;"> <tr> <td style="width: 60%;">National Institute on Aging (NIH/NIA) RO1 funding</td> <td></td> </tr> <tr> <td> </td> <td> </td> </tr> <tr> <td colspan="2" style="text-align: right; font-size: small;">Click the tab key to add additional rows.</td> </tr> </table> | National Institute on Aging (NIH/NIA) RO1 funding |  |  |  | Click the tab key to add additional rows. |  |
| National Institute on Aging (NIH/NIA) RO1 funding  |                                                                                                                                                                                |                                                                                                                                                                                                                                                                                                                                                                          |                                                   |  |  |  |                                           |  |
|                                                    |                                                                                                                                                                                |                                                                                                                                                                                                                                                                                                                                                                          |                                                   |  |  |  |                                           |  |
| Click the tab key to add additional rows.          |                                                                                                                                                                                |                                                                                                                                                                                                                                                                                                                                                                          |                                                   |  |  |  |                                           |  |
| Time frame: past 36 months                         |                                                                                                                                                                                |                                                                                                                                                                                                                                                                                                                                                                          |                                                   |  |  |  |                                           |  |
| <b>2</b>                                           | Grants or contracts from any entity (if not indicated in item #1 above).                                                                                                       | <input checked="" type="checkbox"/> None<br><table border="1" style="width: 100%; border-collapse: collapse;"> <tr> <td style="width: 60%;"> </td> <td> </td> </tr> <tr> <td> </td> <td> </td> </tr> <tr> <td> </td> <td> </td> </tr> </table>                                                                                                                           |                                                   |  |  |  |                                           |  |
|                                                    |                                                                                                                                                                                |                                                                                                                                                                                                                                                                                                                                                                          |                                                   |  |  |  |                                           |  |
|                                                    |                                                                                                                                                                                |                                                                                                                                                                                                                                                                                                                                                                          |                                                   |  |  |  |                                           |  |
|                                                    |                                                                                                                                                                                |                                                                                                                                                                                                                                                                                                                                                                          |                                                   |  |  |  |                                           |  |

|                                                 |                                                                                                              |                                                                                                                                                                                                                                           |                                                 |  |  |  |  |  |
|-------------------------------------------------|--------------------------------------------------------------------------------------------------------------|-------------------------------------------------------------------------------------------------------------------------------------------------------------------------------------------------------------------------------------------|-------------------------------------------------|--|--|--|--|--|
| 3                                               | Royalties or licenses                                                                                        | <input checked="" type="checkbox"/> <b>None</b><br><table border="1" data-bbox="391 195 963 296"> <tr><td> </td><td> </td></tr> <tr><td> </td><td> </td></tr> <tr><td> </td><td> </td></tr> </table>                                      |                                                 |  |  |  |  |  |
|                                                 |                                                                                                              |                                                                                                                                                                                                                                           |                                                 |  |  |  |  |  |
|                                                 |                                                                                                              |                                                                                                                                                                                                                                           |                                                 |  |  |  |  |  |
|                                                 |                                                                                                              |                                                                                                                                                                                                                                           |                                                 |  |  |  |  |  |
| 4                                               | Consulting fees                                                                                              | <input checked="" type="checkbox"/> <b>None</b><br><table border="1" data-bbox="391 436 963 569"> <tr><td> </td><td> </td></tr> <tr><td> </td><td> </td></tr> <tr><td> </td><td> </td></tr> </table>                                      |                                                 |  |  |  |  |  |
|                                                 |                                                                                                              |                                                                                                                                                                                                                                           |                                                 |  |  |  |  |  |
|                                                 |                                                                                                              |                                                                                                                                                                                                                                           |                                                 |  |  |  |  |  |
|                                                 |                                                                                                              |                                                                                                                                                                                                                                           |                                                 |  |  |  |  |  |
| 5                                               | Payment or honoraria for lectures, presentations, speakers bureaus, manuscript writing or educational events | <input checked="" type="checkbox"/> <b>None</b><br><table border="1" data-bbox="391 657 963 758"> <tr><td> </td><td> </td></tr> <tr><td> </td><td> </td></tr> <tr><td> </td><td> </td></tr> </table>                                      |                                                 |  |  |  |  |  |
|                                                 |                                                                                                              |                                                                                                                                                                                                                                           |                                                 |  |  |  |  |  |
|                                                 |                                                                                                              |                                                                                                                                                                                                                                           |                                                 |  |  |  |  |  |
|                                                 |                                                                                                              |                                                                                                                                                                                                                                           |                                                 |  |  |  |  |  |
| 6                                               | Payment for expert testimony                                                                                 | <input checked="" type="checkbox"/> <b>None</b><br><table border="1" data-bbox="391 1003 963 1104"> <tr><td> </td><td> </td></tr> <tr><td> </td><td> </td></tr> <tr><td> </td><td> </td></tr> </table>                                    |                                                 |  |  |  |  |  |
|                                                 |                                                                                                              |                                                                                                                                                                                                                                           |                                                 |  |  |  |  |  |
|                                                 |                                                                                                              |                                                                                                                                                                                                                                           |                                                 |  |  |  |  |  |
|                                                 |                                                                                                              |                                                                                                                                                                                                                                           |                                                 |  |  |  |  |  |
| 7                                               | Support for attending meetings and/or travel                                                                 | <input checked="" type="checkbox"/> <b>None</b><br><table border="1" data-bbox="391 1224 963 1325"> <tr><td> </td><td> </td></tr> <tr><td> </td><td> </td></tr> <tr><td> </td><td> </td></tr> </table>                                    |                                                 |  |  |  |  |  |
|                                                 |                                                                                                              |                                                                                                                                                                                                                                           |                                                 |  |  |  |  |  |
|                                                 |                                                                                                              |                                                                                                                                                                                                                                           |                                                 |  |  |  |  |  |
|                                                 |                                                                                                              |                                                                                                                                                                                                                                           |                                                 |  |  |  |  |  |
| 8                                               | Patents planned, issued or pending                                                                           | <input checked="" type="checkbox"/> <b>None</b><br><table border="1" data-bbox="391 1444 963 1545"> <tr><td> </td><td> </td></tr> <tr><td> </td><td> </td></tr> <tr><td> </td><td> </td></tr> </table>                                    |                                                 |  |  |  |  |  |
|                                                 |                                                                                                              |                                                                                                                                                                                                                                           |                                                 |  |  |  |  |  |
|                                                 |                                                                                                              |                                                                                                                                                                                                                                           |                                                 |  |  |  |  |  |
|                                                 |                                                                                                              |                                                                                                                                                                                                                                           |                                                 |  |  |  |  |  |
| 9                                               | Participation on a Data Safety Monitoring Board or Advisory Board                                            | <input checked="" type="checkbox"/> <b>None</b><br><table border="1" data-bbox="391 1665 963 1766"> <tr><td> </td><td> </td></tr> <tr><td> </td><td> </td></tr> <tr><td> </td><td> </td></tr> </table>                                    |                                                 |  |  |  |  |  |
|                                                 |                                                                                                              |                                                                                                                                                                                                                                           |                                                 |  |  |  |  |  |
|                                                 |                                                                                                              |                                                                                                                                                                                                                                           |                                                 |  |  |  |  |  |
|                                                 |                                                                                                              |                                                                                                                                                                                                                                           |                                                 |  |  |  |  |  |
| 10                                              | Leadership or fiduciary role in other board, society, committee or                                           | <input type="checkbox"/> <b>None</b><br><table border="1" data-bbox="391 1843 963 1944"> <tr><td>Alzheimer's Association PIA Executive Committee</td><td> </td></tr> <tr><td> </td><td> </td></tr> <tr><td> </td><td> </td></tr> </table> | Alzheimer's Association PIA Executive Committee |  |  |  |  |  |
| Alzheimer's Association PIA Executive Committee |                                                                                                              |                                                                                                                                                                                                                                           |                                                 |  |  |  |  |  |
|                                                 |                                                                                                              |                                                                                                                                                                                                                                           |                                                 |  |  |  |  |  |
|                                                 |                                                                                                              |                                                                                                                                                                                                                                           |                                                 |  |  |  |  |  |

|                                              |                                                                                  |                                                                                                                                                                                                                                |                             |  |                                              |  |  |  |
|----------------------------------------------|----------------------------------------------------------------------------------|--------------------------------------------------------------------------------------------------------------------------------------------------------------------------------------------------------------------------------|-----------------------------|--|----------------------------------------------|--|--|--|
|                                              | advocacy group, paid or unpaid                                                   |                                                                                                                                                                                                                                |                             |  |                                              |  |  |  |
| <b>11</b>                                    | Stock or stock options                                                           | <input checked="" type="checkbox"/> <b>None</b><br><table border="1"> <tr><td></td><td></td></tr> <tr><td></td><td></td></tr> <tr><td></td><td></td></tr> </table>                                                             |                             |  |                                              |  |  |  |
|                                              |                                                                                  |                                                                                                                                                                                                                                |                             |  |                                              |  |  |  |
|                                              |                                                                                  |                                                                                                                                                                                                                                |                             |  |                                              |  |  |  |
|                                              |                                                                                  |                                                                                                                                                                                                                                |                             |  |                                              |  |  |  |
| <b>12</b>                                    | Receipt of equipment, materials, drugs, medical writing, gifts or other services | <input checked="" type="checkbox"/> <b>None</b><br><table border="1"> <tr><td></td><td></td></tr> <tr><td></td><td></td></tr> <tr><td></td><td></td></tr> </table>                                                             |                             |  |                                              |  |  |  |
|                                              |                                                                                  |                                                                                                                                                                                                                                |                             |  |                                              |  |  |  |
|                                              |                                                                                  |                                                                                                                                                                                                                                |                             |  |                                              |  |  |  |
|                                              |                                                                                  |                                                                                                                                                                                                                                |                             |  |                                              |  |  |  |
| <b>13</b>                                    | Other financial or non-financial interests                                       | <input type="checkbox"/> <b>None</b><br><table border="1"> <tr><td>Shiley Endowed Chair (UCSD)</td><td></td></tr> <tr><td>Epstein Family Research Collaboration (UCSD)</td><td></td></tr> <tr><td></td><td></td></tr> </table> | Shiley Endowed Chair (UCSD) |  | Epstein Family Research Collaboration (UCSD) |  |  |  |
| Shiley Endowed Chair (UCSD)                  |                                                                                  |                                                                                                                                                                                                                                |                             |  |                                              |  |  |  |
| Epstein Family Research Collaboration (UCSD) |                                                                                  |                                                                                                                                                                                                                                |                             |  |                                              |  |  |  |
|                                              |                                                                                  |                                                                                                                                                                                                                                |                             |  |                                              |  |  |  |

**Please place an "X" next to the following statement to indicate your agreement:**

I certify that I have answered every question and have not altered the wording of any of the questions on this form.

## ICMJE DISCLOSURE FORM

**Date:** 6/3/2021

**Your Name:** Vahan Aslanyan

**Manuscript Title:** Higher baseline levels of CSF inflammation increase risk of incident mild cognitive impairment and Alzheimer’s disease dementia

**Manuscript Number (if known):** DADM-D-22-00031R1

In the interest of transparency, we ask you to disclose all relationships/activities/interests listed below that are related to the content of your manuscript. “Related” means any relation with for-profit or not-for-profit third parties whose interests may be affected by the content of the manuscript. Disclosure represents a commitment to transparency and does not necessarily indicate a bias. If you are in doubt about whether to list a relationship/activity/interest, it is preferable that you do so.

The author’s relationships/activities/interests should be defined broadly. For example, if your manuscript pertains to the epidemiology of hypertension, you should declare all relationships with manufacturers of antihypertensive medication, even if that medication is not mentioned in the manuscript.

In item #1 below, report all support for the work reported in this manuscript without time limit. For all other items, the time frame for disclosure is the past 36 months.

|                                                    |                                                                                                                                                                                | Name all entities with whom you have this relationship or indicate none (add rows as needed)                                                                                                                                                                                                                                            | Specifications/Comments (e.g., if payments were made to you or to your institution) |  |  |  |  |  |                                           |
|----------------------------------------------------|--------------------------------------------------------------------------------------------------------------------------------------------------------------------------------|-----------------------------------------------------------------------------------------------------------------------------------------------------------------------------------------------------------------------------------------------------------------------------------------------------------------------------------------|-------------------------------------------------------------------------------------|--|--|--|--|--|-------------------------------------------|
| Time frame: Since the initial planning of the work |                                                                                                                                                                                |                                                                                                                                                                                                                                                                                                                                         |                                                                                     |  |  |  |  |  |                                           |
| <b>1</b>                                           | All support for the present manuscript (e.g., funding, provision of study materials, medical writing, article processing charges, etc.)<br><b>No time limit for this item.</b> | <input checked="" type="checkbox"/> None<br><table border="1" style="width: 100%; height: 40px; margin-top: 5px;"> <tr><td style="width: 50%;"></td><td style="width: 50%;"></td></tr> <tr><td style="width: 50%;"></td><td style="width: 50%;"></td></tr> <tr><td style="width: 50%;"></td><td style="width: 50%;"></td></tr> </table> |                                                                                     |  |  |  |  |  | Click the tab key to add additional rows. |
|                                                    |                                                                                                                                                                                |                                                                                                                                                                                                                                                                                                                                         |                                                                                     |  |  |  |  |  |                                           |
|                                                    |                                                                                                                                                                                |                                                                                                                                                                                                                                                                                                                                         |                                                                                     |  |  |  |  |  |                                           |
|                                                    |                                                                                                                                                                                |                                                                                                                                                                                                                                                                                                                                         |                                                                                     |  |  |  |  |  |                                           |
| Time frame: past 36 months                         |                                                                                                                                                                                |                                                                                                                                                                                                                                                                                                                                         |                                                                                     |  |  |  |  |  |                                           |
| <b>2</b>                                           | Grants or contracts from any entity (if not indicated in item #1 above).                                                                                                       | <input checked="" type="checkbox"/> None<br><table border="1" style="width: 100%; height: 40px; margin-top: 5px;"> <tr><td style="width: 50%;"></td><td style="width: 50%;"></td></tr> <tr><td style="width: 50%;"></td><td style="width: 50%;"></td></tr> <tr><td style="width: 50%;"></td><td style="width: 50%;"></td></tr> </table> |                                                                                     |  |  |  |  |  |                                           |
|                                                    |                                                                                                                                                                                |                                                                                                                                                                                                                                                                                                                                         |                                                                                     |  |  |  |  |  |                                           |
|                                                    |                                                                                                                                                                                |                                                                                                                                                                                                                                                                                                                                         |                                                                                     |  |  |  |  |  |                                           |
|                                                    |                                                                                                                                                                                |                                                                                                                                                                                                                                                                                                                                         |                                                                                     |  |  |  |  |  |                                           |

|    |                                                                                                              |                                                                                                                                                                                                        |  |  |  |  |  |  |
|----|--------------------------------------------------------------------------------------------------------------|--------------------------------------------------------------------------------------------------------------------------------------------------------------------------------------------------------|--|--|--|--|--|--|
| 3  | Royalties or licenses                                                                                        | <input checked="" type="checkbox"/> <b>None</b><br><table border="1" data-bbox="391 195 964 296"> <tr><td> </td><td> </td></tr> <tr><td> </td><td> </td></tr> <tr><td> </td><td> </td></tr> </table>   |  |  |  |  |  |  |
|    |                                                                                                              |                                                                                                                                                                                                        |  |  |  |  |  |  |
|    |                                                                                                              |                                                                                                                                                                                                        |  |  |  |  |  |  |
|    |                                                                                                              |                                                                                                                                                                                                        |  |  |  |  |  |  |
| 4  | Consulting fees                                                                                              | <input checked="" type="checkbox"/> <b>None</b><br><table border="1" data-bbox="391 436 964 571"> <tr><td> </td><td> </td></tr> <tr><td> </td><td> </td></tr> <tr><td> </td><td> </td></tr> </table>   |  |  |  |  |  |  |
|    |                                                                                                              |                                                                                                                                                                                                        |  |  |  |  |  |  |
|    |                                                                                                              |                                                                                                                                                                                                        |  |  |  |  |  |  |
|    |                                                                                                              |                                                                                                                                                                                                        |  |  |  |  |  |  |
| 5  | Payment or honoraria for lectures, presentations, speakers bureaus, manuscript writing or educational events | <input checked="" type="checkbox"/> <b>None</b><br><table border="1" data-bbox="391 657 964 758"> <tr><td> </td><td> </td></tr> <tr><td> </td><td> </td></tr> <tr><td> </td><td> </td></tr> </table>   |  |  |  |  |  |  |
|    |                                                                                                              |                                                                                                                                                                                                        |  |  |  |  |  |  |
|    |                                                                                                              |                                                                                                                                                                                                        |  |  |  |  |  |  |
|    |                                                                                                              |                                                                                                                                                                                                        |  |  |  |  |  |  |
| 6  | Payment for expert testimony                                                                                 | <input checked="" type="checkbox"/> <b>None</b><br><table border="1" data-bbox="391 1003 964 1104"> <tr><td> </td><td> </td></tr> <tr><td> </td><td> </td></tr> <tr><td> </td><td> </td></tr> </table> |  |  |  |  |  |  |
|    |                                                                                                              |                                                                                                                                                                                                        |  |  |  |  |  |  |
|    |                                                                                                              |                                                                                                                                                                                                        |  |  |  |  |  |  |
|    |                                                                                                              |                                                                                                                                                                                                        |  |  |  |  |  |  |
| 7  | Support for attending meetings and/or travel                                                                 | <input checked="" type="checkbox"/> <b>None</b><br><table border="1" data-bbox="391 1224 964 1325"> <tr><td> </td><td> </td></tr> <tr><td> </td><td> </td></tr> <tr><td> </td><td> </td></tr> </table> |  |  |  |  |  |  |
|    |                                                                                                              |                                                                                                                                                                                                        |  |  |  |  |  |  |
|    |                                                                                                              |                                                                                                                                                                                                        |  |  |  |  |  |  |
|    |                                                                                                              |                                                                                                                                                                                                        |  |  |  |  |  |  |
| 8  | Patents planned, issued or pending                                                                           | <input checked="" type="checkbox"/> <b>None</b><br><table border="1" data-bbox="391 1444 964 1545"> <tr><td> </td><td> </td></tr> <tr><td> </td><td> </td></tr> <tr><td> </td><td> </td></tr> </table> |  |  |  |  |  |  |
|    |                                                                                                              |                                                                                                                                                                                                        |  |  |  |  |  |  |
|    |                                                                                                              |                                                                                                                                                                                                        |  |  |  |  |  |  |
|    |                                                                                                              |                                                                                                                                                                                                        |  |  |  |  |  |  |
| 9  | Participation on a Data Safety Monitoring Board or Advisory Board                                            | <input checked="" type="checkbox"/> <b>None</b><br><table border="1" data-bbox="391 1665 964 1766"> <tr><td> </td><td> </td></tr> <tr><td> </td><td> </td></tr> <tr><td> </td><td> </td></tr> </table> |  |  |  |  |  |  |
|    |                                                                                                              |                                                                                                                                                                                                        |  |  |  |  |  |  |
|    |                                                                                                              |                                                                                                                                                                                                        |  |  |  |  |  |  |
|    |                                                                                                              |                                                                                                                                                                                                        |  |  |  |  |  |  |
| 10 | Leadership or fiduciary role in other board, society, committee or                                           | <input checked="" type="checkbox"/> <b>None</b><br><table border="1" data-bbox="391 1843 964 1944"> <tr><td> </td><td> </td></tr> <tr><td> </td><td> </td></tr> <tr><td> </td><td> </td></tr> </table> |  |  |  |  |  |  |
|    |                                                                                                              |                                                                                                                                                                                                        |  |  |  |  |  |  |
|    |                                                                                                              |                                                                                                                                                                                                        |  |  |  |  |  |  |
|    |                                                                                                              |                                                                                                                                                                                                        |  |  |  |  |  |  |



|           |                                                                                  |                                                                                                                                                                    |  |  |  |  |  |  |
|-----------|----------------------------------------------------------------------------------|--------------------------------------------------------------------------------------------------------------------------------------------------------------------|--|--|--|--|--|--|
|           | advocacy group, paid or unpaid                                                   |                                                                                                                                                                    |  |  |  |  |  |  |
| <b>11</b> | Stock or stock options                                                           | <input checked="" type="checkbox"/> <b>None</b><br><table border="1"> <tr><td></td><td></td></tr> <tr><td></td><td></td></tr> <tr><td></td><td></td></tr> </table> |  |  |  |  |  |  |
|           |                                                                                  |                                                                                                                                                                    |  |  |  |  |  |  |
|           |                                                                                  |                                                                                                                                                                    |  |  |  |  |  |  |
|           |                                                                                  |                                                                                                                                                                    |  |  |  |  |  |  |
| <b>12</b> | Receipt of equipment, materials, drugs, medical writing, gifts or other services | <input checked="" type="checkbox"/> <b>None</b><br><table border="1"> <tr><td></td><td></td></tr> <tr><td></td><td></td></tr> <tr><td></td><td></td></tr> </table> |  |  |  |  |  |  |
|           |                                                                                  |                                                                                                                                                                    |  |  |  |  |  |  |
|           |                                                                                  |                                                                                                                                                                    |  |  |  |  |  |  |
|           |                                                                                  |                                                                                                                                                                    |  |  |  |  |  |  |
| <b>13</b> | Other financial or non-financial interests                                       | <input checked="" type="checkbox"/> <b>None</b><br><table border="1"> <tr><td></td><td></td></tr> <tr><td></td><td></td></tr> <tr><td></td><td></td></tr> </table> |  |  |  |  |  |  |
|           |                                                                                  |                                                                                                                                                                    |  |  |  |  |  |  |
|           |                                                                                  |                                                                                                                                                                    |  |  |  |  |  |  |
|           |                                                                                  |                                                                                                                                                                    |  |  |  |  |  |  |

**Please place an "X" next to the following statement to indicate your agreement:**

I certify that I have answered every question and have not altered the wording of any of the questions on this form.

## ICMJE DISCLOSURE FORM

**Date:** 6/3/2021

**Your Name:** Wendy J Mack, PhD

**Manuscript Title:** Higher baseline levels of CSF inflammation increase risk of incident mild cognitive impairment and Alzheimer’s disease dementia

**Manuscript Number (if known):** DADM-D-22-00031R1

In the interest of transparency, we ask you to disclose all relationships/activities/interests listed below that are related to the content of your manuscript. “Related” means any relation with for-profit or not-for-profit third parties whose interests may be affected by the content of the manuscript. Disclosure represents a commitment to transparency and does not necessarily indicate a bias. If you are in doubt about whether to list a relationship/activity/interest, it is preferable that you do so.

The author’s relationships/activities/interests should be defined broadly. For example, if your manuscript pertains to the epidemiology of hypertension, you should declare all relationships with manufacturers of antihypertensive medication, even if that medication is not mentioned in the manuscript.

In item #1 below, report all support for the work reported in this manuscript without time limit. For all other items, the time frame for disclosure is the past 36 months.

|                                                    | Name all entities with whom you have this relationship or indicate none (add rows as needed)                                                                                   | Specifications/Comments (e.g., if payments were made to you or to your institution)                                                                                                                                                                                                                                                                                    |  |  |  |  |  |  |
|----------------------------------------------------|--------------------------------------------------------------------------------------------------------------------------------------------------------------------------------|------------------------------------------------------------------------------------------------------------------------------------------------------------------------------------------------------------------------------------------------------------------------------------------------------------------------------------------------------------------------|--|--|--|--|--|--|
| Time frame: Since the initial planning of the work |                                                                                                                                                                                |                                                                                                                                                                                                                                                                                                                                                                        |  |  |  |  |  |  |
| <b>1</b>                                           | All support for the present manuscript (e.g., funding, provision of study materials, medical writing, article processing charges, etc.)<br><b>No time limit for this item.</b> | <input checked="" type="checkbox"/> None<br><table border="1" style="width: 100%; height: 40px; margin-top: 5px;"> <tr><td style="width: 60%;"></td><td style="width: 40%;"></td></tr> <tr><td></td><td></td></tr> <tr><td></td><td></td></tr> </table> <div style="text-align: right; font-size: small; color: gray;">Click the tab key to add additional rows.</div> |  |  |  |  |  |  |
|                                                    |                                                                                                                                                                                |                                                                                                                                                                                                                                                                                                                                                                        |  |  |  |  |  |  |
|                                                    |                                                                                                                                                                                |                                                                                                                                                                                                                                                                                                                                                                        |  |  |  |  |  |  |
|                                                    |                                                                                                                                                                                |                                                                                                                                                                                                                                                                                                                                                                        |  |  |  |  |  |  |
| Time frame: past 36 months                         |                                                                                                                                                                                |                                                                                                                                                                                                                                                                                                                                                                        |  |  |  |  |  |  |
| <b>2</b>                                           | Grants or contracts from any entity (if not indicated in item #1 above).                                                                                                       | <input checked="" type="checkbox"/> None<br><table border="1" style="width: 100%; height: 40px; margin-top: 5px;"> <tr><td style="width: 60%;"></td><td style="width: 40%;"></td></tr> <tr><td></td><td></td></tr> <tr><td></td><td></td></tr> </table>                                                                                                                |  |  |  |  |  |  |
|                                                    |                                                                                                                                                                                |                                                                                                                                                                                                                                                                                                                                                                        |  |  |  |  |  |  |
|                                                    |                                                                                                                                                                                |                                                                                                                                                                                                                                                                                                                                                                        |  |  |  |  |  |  |
|                                                    |                                                                                                                                                                                |                                                                                                                                                                                                                                                                                                                                                                        |  |  |  |  |  |  |

|    |                                                                                                              |                                                                                                                                                                                                        |  |  |  |  |  |  |
|----|--------------------------------------------------------------------------------------------------------------|--------------------------------------------------------------------------------------------------------------------------------------------------------------------------------------------------------|--|--|--|--|--|--|
| 3  | Royalties or licenses                                                                                        | <input checked="" type="checkbox"/> <b>None</b><br><table border="1" data-bbox="391 195 964 296"> <tr><td> </td><td> </td></tr> <tr><td> </td><td> </td></tr> <tr><td> </td><td> </td></tr> </table>   |  |  |  |  |  |  |
|    |                                                                                                              |                                                                                                                                                                                                        |  |  |  |  |  |  |
|    |                                                                                                              |                                                                                                                                                                                                        |  |  |  |  |  |  |
|    |                                                                                                              |                                                                                                                                                                                                        |  |  |  |  |  |  |
| 4  | Consulting fees                                                                                              | <input checked="" type="checkbox"/> <b>None</b><br><table border="1" data-bbox="391 436 964 571"> <tr><td> </td><td> </td></tr> <tr><td> </td><td> </td></tr> <tr><td> </td><td> </td></tr> </table>   |  |  |  |  |  |  |
|    |                                                                                                              |                                                                                                                                                                                                        |  |  |  |  |  |  |
|    |                                                                                                              |                                                                                                                                                                                                        |  |  |  |  |  |  |
|    |                                                                                                              |                                                                                                                                                                                                        |  |  |  |  |  |  |
| 5  | Payment or honoraria for lectures, presentations, speakers bureaus, manuscript writing or educational events | <input checked="" type="checkbox"/> <b>None</b><br><table border="1" data-bbox="391 657 964 758"> <tr><td> </td><td> </td></tr> <tr><td> </td><td> </td></tr> <tr><td> </td><td> </td></tr> </table>   |  |  |  |  |  |  |
|    |                                                                                                              |                                                                                                                                                                                                        |  |  |  |  |  |  |
|    |                                                                                                              |                                                                                                                                                                                                        |  |  |  |  |  |  |
|    |                                                                                                              |                                                                                                                                                                                                        |  |  |  |  |  |  |
| 6  | Payment for expert testimony                                                                                 | <input checked="" type="checkbox"/> <b>None</b><br><table border="1" data-bbox="391 1003 964 1104"> <tr><td> </td><td> </td></tr> <tr><td> </td><td> </td></tr> <tr><td> </td><td> </td></tr> </table> |  |  |  |  |  |  |
|    |                                                                                                              |                                                                                                                                                                                                        |  |  |  |  |  |  |
|    |                                                                                                              |                                                                                                                                                                                                        |  |  |  |  |  |  |
|    |                                                                                                              |                                                                                                                                                                                                        |  |  |  |  |  |  |
| 7  | Support for attending meetings and/or travel                                                                 | <input checked="" type="checkbox"/> <b>None</b><br><table border="1" data-bbox="391 1224 964 1325"> <tr><td> </td><td> </td></tr> <tr><td> </td><td> </td></tr> <tr><td> </td><td> </td></tr> </table> |  |  |  |  |  |  |
|    |                                                                                                              |                                                                                                                                                                                                        |  |  |  |  |  |  |
|    |                                                                                                              |                                                                                                                                                                                                        |  |  |  |  |  |  |
|    |                                                                                                              |                                                                                                                                                                                                        |  |  |  |  |  |  |
| 8  | Patents planned, issued or pending                                                                           | <input checked="" type="checkbox"/> <b>None</b><br><table border="1" data-bbox="391 1444 964 1545"> <tr><td> </td><td> </td></tr> <tr><td> </td><td> </td></tr> <tr><td> </td><td> </td></tr> </table> |  |  |  |  |  |  |
|    |                                                                                                              |                                                                                                                                                                                                        |  |  |  |  |  |  |
|    |                                                                                                              |                                                                                                                                                                                                        |  |  |  |  |  |  |
|    |                                                                                                              |                                                                                                                                                                                                        |  |  |  |  |  |  |
| 9  | Participation on a Data Safety Monitoring Board or Advisory Board                                            | <input checked="" type="checkbox"/> <b>None</b><br><table border="1" data-bbox="391 1665 964 1766"> <tr><td> </td><td> </td></tr> <tr><td> </td><td> </td></tr> <tr><td> </td><td> </td></tr> </table> |  |  |  |  |  |  |
|    |                                                                                                              |                                                                                                                                                                                                        |  |  |  |  |  |  |
|    |                                                                                                              |                                                                                                                                                                                                        |  |  |  |  |  |  |
|    |                                                                                                              |                                                                                                                                                                                                        |  |  |  |  |  |  |
| 10 | Leadership or fiduciary role in other board, society, committee or                                           | <input checked="" type="checkbox"/> <b>None</b><br><table border="1" data-bbox="391 1843 964 1944"> <tr><td> </td><td> </td></tr> <tr><td> </td><td> </td></tr> <tr><td> </td><td> </td></tr> </table> |  |  |  |  |  |  |
|    |                                                                                                              |                                                                                                                                                                                                        |  |  |  |  |  |  |
|    |                                                                                                              |                                                                                                                                                                                                        |  |  |  |  |  |  |
|    |                                                                                                              |                                                                                                                                                                                                        |  |  |  |  |  |  |

|           |                                                                                  |                                                                                                                                                                    |  |  |  |  |  |  |
|-----------|----------------------------------------------------------------------------------|--------------------------------------------------------------------------------------------------------------------------------------------------------------------|--|--|--|--|--|--|
|           | advocacy group, paid or unpaid                                                   |                                                                                                                                                                    |  |  |  |  |  |  |
| <b>11</b> | Stock or stock options                                                           | <input checked="" type="checkbox"/> <b>None</b><br><table border="1"> <tr><td></td><td></td></tr> <tr><td></td><td></td></tr> <tr><td></td><td></td></tr> </table> |  |  |  |  |  |  |
|           |                                                                                  |                                                                                                                                                                    |  |  |  |  |  |  |
|           |                                                                                  |                                                                                                                                                                    |  |  |  |  |  |  |
|           |                                                                                  |                                                                                                                                                                    |  |  |  |  |  |  |
| <b>12</b> | Receipt of equipment, materials, drugs, medical writing, gifts or other services | <input checked="" type="checkbox"/> <b>None</b><br><table border="1"> <tr><td></td><td></td></tr> <tr><td></td><td></td></tr> <tr><td></td><td></td></tr> </table> |  |  |  |  |  |  |
|           |                                                                                  |                                                                                                                                                                    |  |  |  |  |  |  |
|           |                                                                                  |                                                                                                                                                                    |  |  |  |  |  |  |
|           |                                                                                  |                                                                                                                                                                    |  |  |  |  |  |  |
| <b>13</b> | Other financial or non-financial interests                                       | <input checked="" type="checkbox"/> <b>None</b><br><table border="1"> <tr><td></td><td></td></tr> <tr><td></td><td></td></tr> <tr><td></td><td></td></tr> </table> |  |  |  |  |  |  |
|           |                                                                                  |                                                                                                                                                                    |  |  |  |  |  |  |
|           |                                                                                  |                                                                                                                                                                    |  |  |  |  |  |  |
|           |                                                                                  |                                                                                                                                                                    |  |  |  |  |  |  |

**Please place an "X" next to the following statement to indicate your agreement:**

I certify that I have answered every question and have not altered the wording of any of the questions on this form.

## ICMJE DISCLOSURE FORM

**Date:** 6/2/2021

**Your Name:** Daniel Strakis Albrecht

**Manuscript Title:** Higher baseline levels of CSF inflammation increase risk of incident mild cognitive impairment and Alzheimer's disease dementia

**Manuscript Number (if known):** DADM-D-22-00031R1

In the interest of transparency, we ask you to disclose all relationships/activities/interests listed below that are related to the content of your manuscript. "Related" means any relation with for-profit or not-for-profit third parties whose interests may be affected by the content of the manuscript. Disclosure represents a commitment to transparency and does not necessarily indicate a bias. If you are in doubt about whether to list a relationship/activity/interest, it is preferable that you do so.

The author's relationships/activities/interests should be defined broadly. For example, if your manuscript pertains to the epidemiology of hypertension, you should declare all relationships with manufacturers of antihypertensive medication, even if that medication is not mentioned in the manuscript.

In item #1 below, report all support for the work reported in this manuscript without time limit. For all other items, the time frame for disclosure is the past 36 months.

|                                                    | Name all entities with whom you have this relationship or indicate none (add rows as needed)                                                                                   | Specifications/Comments (e.g., if payments were made to you or to your institution)                                                                                                                                                                                                                                                                       |  |  |  |  |  |  |
|----------------------------------------------------|--------------------------------------------------------------------------------------------------------------------------------------------------------------------------------|-----------------------------------------------------------------------------------------------------------------------------------------------------------------------------------------------------------------------------------------------------------------------------------------------------------------------------------------------------------|--|--|--|--|--|--|
| Time frame: Since the initial planning of the work |                                                                                                                                                                                |                                                                                                                                                                                                                                                                                                                                                           |  |  |  |  |  |  |
| <b>1</b>                                           | All support for the present manuscript (e.g., funding, provision of study materials, medical writing, article processing charges, etc.)<br><b>No time limit for this item.</b> | <input checked="" type="checkbox"/> <b>None</b><br><table border="1" style="width: 100%; height: 40px; margin-top: 5px;"> <tr><td style="width: 60%;"></td><td></td></tr> <tr><td></td><td></td></tr> <tr><td></td><td></td></tr> </table> <p style="font-size: small; text-align: right; margin-top: 5px;">Click the tab key to add additional rows.</p> |  |  |  |  |  |  |
|                                                    |                                                                                                                                                                                |                                                                                                                                                                                                                                                                                                                                                           |  |  |  |  |  |  |
|                                                    |                                                                                                                                                                                |                                                                                                                                                                                                                                                                                                                                                           |  |  |  |  |  |  |
|                                                    |                                                                                                                                                                                |                                                                                                                                                                                                                                                                                                                                                           |  |  |  |  |  |  |
| Time frame: past 36 months                         |                                                                                                                                                                                |                                                                                                                                                                                                                                                                                                                                                           |  |  |  |  |  |  |
| <b>2</b>                                           | Grants or contracts from any entity (if not indicated in item #1 above).                                                                                                       | <input checked="" type="checkbox"/> <b>None</b><br><table border="1" style="width: 100%; height: 40px; margin-top: 5px;"> <tr><td style="width: 60%;"></td><td></td></tr> <tr><td></td><td></td></tr> <tr><td></td><td></td></tr> </table>                                                                                                                |  |  |  |  |  |  |
|                                                    |                                                                                                                                                                                |                                                                                                                                                                                                                                                                                                                                                           |  |  |  |  |  |  |
|                                                    |                                                                                                                                                                                |                                                                                                                                                                                                                                                                                                                                                           |  |  |  |  |  |  |
|                                                    |                                                                                                                                                                                |                                                                                                                                                                                                                                                                                                                                                           |  |  |  |  |  |  |
| <b>3</b>                                           | Royalties or licenses                                                                                                                                                          | <input checked="" type="checkbox"/> <b>None</b><br><table border="1" style="width: 100%; height: 40px; margin-top: 5px;"> <tr><td style="width: 60%;"></td><td></td></tr> <tr><td></td><td></td></tr> <tr><td></td><td></td></tr> </table>                                                                                                                |  |  |  |  |  |  |
|                                                    |                                                                                                                                                                                |                                                                                                                                                                                                                                                                                                                                                           |  |  |  |  |  |  |
|                                                    |                                                                                                                                                                                |                                                                                                                                                                                                                                                                                                                                                           |  |  |  |  |  |  |
|                                                    |                                                                                                                                                                                |                                                                                                                                                                                                                                                                                                                                                           |  |  |  |  |  |  |

|    |                                                                                                              | Name all entities with whom you have this relationship or indicate none (add rows as needed)                                                                                                                                                                                                                                                                           | Specifications/Comments (e.g., if payments were made to you or to your institution) |  |  |  |  |  |  |  |  |
|----|--------------------------------------------------------------------------------------------------------------|------------------------------------------------------------------------------------------------------------------------------------------------------------------------------------------------------------------------------------------------------------------------------------------------------------------------------------------------------------------------|-------------------------------------------------------------------------------------|--|--|--|--|--|--|--|--|
| 4  | Consulting fees                                                                                              | <input checked="" type="checkbox"/> <b>None</b><br><table border="1" style="width: 100%; border-collapse: collapse;"> <tr><td style="width: 50%; height: 15px;"></td><td style="width: 50%;"></td></tr> <tr><td style="height: 15px;"></td><td></td></tr> <tr><td style="height: 15px;"></td><td></td></tr> <tr><td style="height: 15px;"></td><td></td></tr> </table> |                                                                                     |  |  |  |  |  |  |  |  |
|    |                                                                                                              |                                                                                                                                                                                                                                                                                                                                                                        |                                                                                     |  |  |  |  |  |  |  |  |
|    |                                                                                                              |                                                                                                                                                                                                                                                                                                                                                                        |                                                                                     |  |  |  |  |  |  |  |  |
|    |                                                                                                              |                                                                                                                                                                                                                                                                                                                                                                        |                                                                                     |  |  |  |  |  |  |  |  |
|    |                                                                                                              |                                                                                                                                                                                                                                                                                                                                                                        |                                                                                     |  |  |  |  |  |  |  |  |
| 5  | Payment or honoraria for lectures, presentations, speakers bureaus, manuscript writing or educational events | <input checked="" type="checkbox"/> <b>None</b><br><table border="1" style="width: 100%; border-collapse: collapse;"> <tr><td style="width: 50%; height: 15px;"></td><td style="width: 50%;"></td></tr> <tr><td style="height: 15px;"></td><td></td></tr> <tr><td style="height: 15px;"></td><td></td></tr> </table>                                                   |                                                                                     |  |  |  |  |  |  |  |  |
|    |                                                                                                              |                                                                                                                                                                                                                                                                                                                                                                        |                                                                                     |  |  |  |  |  |  |  |  |
|    |                                                                                                              |                                                                                                                                                                                                                                                                                                                                                                        |                                                                                     |  |  |  |  |  |  |  |  |
|    |                                                                                                              |                                                                                                                                                                                                                                                                                                                                                                        |                                                                                     |  |  |  |  |  |  |  |  |
| 6  | Payment for expert testimony                                                                                 | <input checked="" type="checkbox"/> <b>None</b><br><table border="1" style="width: 100%; border-collapse: collapse;"> <tr><td style="width: 50%; height: 15px;"></td><td style="width: 50%;"></td></tr> <tr><td style="height: 15px;"></td><td></td></tr> <tr><td style="height: 15px;"></td><td></td></tr> </table>                                                   |                                                                                     |  |  |  |  |  |  |  |  |
|    |                                                                                                              |                                                                                                                                                                                                                                                                                                                                                                        |                                                                                     |  |  |  |  |  |  |  |  |
|    |                                                                                                              |                                                                                                                                                                                                                                                                                                                                                                        |                                                                                     |  |  |  |  |  |  |  |  |
|    |                                                                                                              |                                                                                                                                                                                                                                                                                                                                                                        |                                                                                     |  |  |  |  |  |  |  |  |
| 7  | Support for attending meetings and/or travel                                                                 | <input checked="" type="checkbox"/> <b>None</b><br><table border="1" style="width: 100%; border-collapse: collapse;"> <tr><td style="width: 50%; height: 15px;"></td><td style="width: 50%;"></td></tr> <tr><td style="height: 15px;"></td><td></td></tr> <tr><td style="height: 15px;"></td><td></td></tr> </table>                                                   |                                                                                     |  |  |  |  |  |  |  |  |
|    |                                                                                                              |                                                                                                                                                                                                                                                                                                                                                                        |                                                                                     |  |  |  |  |  |  |  |  |
|    |                                                                                                              |                                                                                                                                                                                                                                                                                                                                                                        |                                                                                     |  |  |  |  |  |  |  |  |
|    |                                                                                                              |                                                                                                                                                                                                                                                                                                                                                                        |                                                                                     |  |  |  |  |  |  |  |  |
| 8  | Patents planned, issued or pending                                                                           | <input checked="" type="checkbox"/> <b>None</b><br><table border="1" style="width: 100%; border-collapse: collapse;"> <tr><td style="width: 50%; height: 15px;"></td><td style="width: 50%;"></td></tr> <tr><td style="height: 15px;"></td><td></td></tr> <tr><td style="height: 15px;"></td><td></td></tr> </table>                                                   |                                                                                     |  |  |  |  |  |  |  |  |
|    |                                                                                                              |                                                                                                                                                                                                                                                                                                                                                                        |                                                                                     |  |  |  |  |  |  |  |  |
|    |                                                                                                              |                                                                                                                                                                                                                                                                                                                                                                        |                                                                                     |  |  |  |  |  |  |  |  |
|    |                                                                                                              |                                                                                                                                                                                                                                                                                                                                                                        |                                                                                     |  |  |  |  |  |  |  |  |
| 9  | Participation on a Data Safety Monitoring Board or Advisory Board                                            | <input checked="" type="checkbox"/> <b>None</b><br><table border="1" style="width: 100%; border-collapse: collapse;"> <tr><td style="width: 50%; height: 15px;"></td><td style="width: 50%;"></td></tr> <tr><td style="height: 15px;"></td><td></td></tr> <tr><td style="height: 15px;"></td><td></td></tr> </table>                                                   |                                                                                     |  |  |  |  |  |  |  |  |
|    |                                                                                                              |                                                                                                                                                                                                                                                                                                                                                                        |                                                                                     |  |  |  |  |  |  |  |  |
|    |                                                                                                              |                                                                                                                                                                                                                                                                                                                                                                        |                                                                                     |  |  |  |  |  |  |  |  |
|    |                                                                                                              |                                                                                                                                                                                                                                                                                                                                                                        |                                                                                     |  |  |  |  |  |  |  |  |
| 10 | Leadership or fiduciary role in other board, society, committee or advocacy group, paid or unpaid            | <input checked="" type="checkbox"/> <b>None</b><br><table border="1" style="width: 100%; border-collapse: collapse;"> <tr><td style="width: 50%; height: 15px;"></td><td style="width: 50%;"></td></tr> <tr><td style="height: 15px;"></td><td></td></tr> <tr><td style="height: 15px;"></td><td></td></tr> </table>                                                   |                                                                                     |  |  |  |  |  |  |  |  |
|    |                                                                                                              |                                                                                                                                                                                                                                                                                                                                                                        |                                                                                     |  |  |  |  |  |  |  |  |
|    |                                                                                                              |                                                                                                                                                                                                                                                                                                                                                                        |                                                                                     |  |  |  |  |  |  |  |  |
|    |                                                                                                              |                                                                                                                                                                                                                                                                                                                                                                        |                                                                                     |  |  |  |  |  |  |  |  |

|    |                                                                                  | Name all entities with whom you have this relationship or indicate none (add rows as needed) | Specifications/Comments (e.g., if payments were made to you or to your institution) |
|----|----------------------------------------------------------------------------------|----------------------------------------------------------------------------------------------|-------------------------------------------------------------------------------------|
| 11 | Stock or stock options                                                           | <input checked="" type="checkbox"/> None                                                     |                                                                                     |
|    |                                                                                  |                                                                                              |                                                                                     |
|    |                                                                                  |                                                                                              |                                                                                     |
|    |                                                                                  |                                                                                              |                                                                                     |
| 12 | Receipt of equipment, materials, drugs, medical writing, gifts or other services | <input checked="" type="checkbox"/> None                                                     |                                                                                     |
|    |                                                                                  |                                                                                              |                                                                                     |
|    |                                                                                  |                                                                                              |                                                                                     |
|    |                                                                                  |                                                                                              |                                                                                     |
| 13 | Other financial or non-financial interests                                       | <input checked="" type="checkbox"/> None                                                     |                                                                                     |
|    |                                                                                  |                                                                                              |                                                                                     |
|    |                                                                                  |                                                                                              |                                                                                     |
|    |                                                                                  |                                                                                              |                                                                                     |

Please place an "X" next to the following statement to indicate your agreement:

I certify that I have answered every question and have not altered the wording of any of the questions on this form.
